# Supplementary material for: Effect of sugar-sweetened beverage taxation on sugars intake and dental caries: an umbrella review of a global perspective
Source: PubMed Central journal article supplement (PMC10224604; doi:10.1186/s12889-023-15884-5), 2023-05-27
Supplement: 12889_2023_15884_MOESM5_ESM.pdf [file 12889_2023_15884_MOESM5_ESM.pdf]

**Additional file 5: AMSTAR results for included systematic reviews and evidence syntheses**

| Review                 | Q1 | Q2 | Q3 | Q4 | Q5 | Q6 | Q7 | Q8 | Q9 | Q10 | Q11 | total | class    |
|------------------------|----|----|----|----|----|----|----|----|----|-----|-----|-------|----------|
| Itria et al 2021       | Y  | Y  | Y  | Y  | N  | Y  | Y  | Y  | N  | N   | Y   | 8     | High     |
| Sobham et al 2019      | N  | Y  | Y  | Y  | N  | Y  | Y  | N  | N  | N   | Y   | 6     | Moderate |
| Teng 2019              | Y  | Y  | Y  | Y  | N  | Y  | Y  | Y  | Y  | Y   | Y   | 10    | High     |
| Bergallo 2018          | N  | CA | Y  | Y  | N  | Y  | N  | N  | N  | N   | Y   | 4     | Moderate |
| Redondo et al 2018     | N  | Y  | Y  | Y  | N  | Y  | N  | N  | N  | N   | Y   | 5     | Moderate |
| Afshin et al 2017      | Y  | Y  | Y  | Y  | N  | Y  | Y  | Y  | Y  | Y   | Y   | 10    | High     |
| Nakhimovsky et al 2016 | Y  | N  | Y  | Y  | N  | Y  | Y  | Y  | Y  | N   | Y   | 8     | High     |
| Backholer et al 2016   | N  | Y  | Y  | Y  | N  | Y  | Y  | N  | N  | N   | Y   | 6     | Moderate |
| Niebylski et al 2015   | N  | N  | Y  | Y  | N  | N  | N  | N  | N  | N   | N   | 2     | Low      |
| Thow 2014              | N  | CA | Y  | Y  | N  | Y  | Y  | N  | Y  | N   | Y   | 6     | Moderate |
| Cabrera Escobar, 2013  | N  | N  | Y  | N  | N  | Y  | N  | N  | Y  | Y   | Y   | 5     | Moderate |
| Maniadakis et al 2013  | N  | CA | Y  | Y  | N  | Y  | N  | N  | N  | N   | Y   | 4     | Moderate |
| Powell et al 2013      | N  | Y  | Y  | Y  | N  | Y  | N  | N  | Y  | N   | Y   | 6     | Moderate |
| Andreyeva et al 2010   | N  | Y  | Y  | Y  | Y  | N  | N  | N  | Y  | N   | N   | 5     | Moderate |
| Moynihan & Kelly 2014  | Y  | Y  | Y  | Y  | Y  | Y  | Y  | Y  | Y  | N   | Y   | 10    | High     |
| SACN 2015              | N  | N  | Y  | Y  | Y  | Y  | N  | N  | NA | N   | N   | 4     | Moderate |
| Mahboobi et al 2021    | Y  | Y  | Y  | Y  | N  | Y  | Y  | N  | N  | N   | Y   | 7     | Moderate |
| Turck et al 2022       | Y  | CA | Y  | Y  | N  | Y  | N  | Y  | N  | NA  | Y   | 6     | Moderate |
| Moores et al 2022      | Y  | Y  | Y  | Y  | Y  | Y  | Y  | Y  | Y  | N   | Y   | 10    | High     |

Y: yes, N: no, C/A: cannot answer, N/A: not applicable, \*not done for studies relevant to this review.

**Q1. Was an 'a priori' design provided?**

**Q2. Was there duplicate study selection and data extraction?**

**Q3. Was a comprehensive literature search performed?**

**Q4. Was the status of publication (i.e. grey literature) used as an inclusion criterion?**

**Q5. Was a list of studies (included and excluded) provided?**

- Q6. Were the characteristics of the included studies provided?**
- Q7. Was the scientific quality of the included studies assessed and documented?**
- Q8. Was the scientific quality of the included studies used appropriately in formulating conclusions?**
- Q9. Were the methods used to combine the findings of studies appropriate?**
- Q10. Was the likelihood of publication bias assessed?**
- Q11. Was the conflict of interest included?**
